# Supplementary material for: Effect of 17β-estradiol on a Human Vaginal Lactobacillus Crispatus Strain
Source: Research Square preprint supplement (doi:10.21203/rs.3.rs-114432/v1), 2020-12-08
Supplement: Supplementary file 1 [file 324581f440f0068ff287ab69.docx]

***Supplementary data title page:***

**Effect of 17β-estradiol on a human vaginal *Lactobacillus crispatus* strain**

Maximilien CLABAUT, Amandine SUET, Pierre-Jean RACINE, Ali TAHRIOUI, Julien VERDON, Magalie BARREAU, Olivier MAILLOT, Agathe LE TIRANT, Madina KARSYBAYEVA, Coralie KREMSER, Gérard REDZINIAK, Cécile DUCLAIROIR-POC, Chantal PICHON, Sylvie CHEVALIER, Marc G.J. FEUILLOLEY

**Supplementary Figure 1.** Growth kinetics of *Lactobacillus crispatus* CIP 104459 in the absence or presence 17β-estradiol 10-6, 10-8 and 10-10 M. Bacteria were grown in anaerobic conditions at 37°C for 24h in MRS broth. OD600nm was measured every 15 min using an automated microplate reader. All data are the mean ± SEM of four independent experiments.

**Supplementary Figure 2**. Influence of 17β-estradiol 10-6, 10-8 and 10-10 M on *Lactobacillus crispatus* CIP 104459 aggregation potential. The percentage of aggregation was measured after 30 min of pellet re-suspension. All data are the mean ± SEM of three independent experiments. (NS: not significant).

**Supplementary Figure 3**. Growth kinetics of *Lactobacillus crispatus* CIP 104459 in simulating genital tract secretion (SGTS) medium in the absence or presence 17β-estradiol 10-6, 10-8 and 10-10 M. All data are the mean ± SEM of four independent experiments.
